# Supplementary material for: Covalency in AnCl2 (An = Th–No)
Source: Royal Society of Chemistry journal article supplement (doi:10.1039/d2dt00315e), 2022-01-01
Supplement: d2dt00315e1.pdf [file d2dt00315e1.pdf]

# Covalency in $AnCl_2$ (An=Th-No)

Sophie Cooper and Nikolas Kaltsoyannis\*

Department of Chemistry, School of Natural Sciences, The University of Manchester, Oxford  
Road, Manchester, UK, M13 9PL.

ORCID

Sophie Cooper: 0000-0002-2508-0815

Nikolas Kaltsoyannis: 0000-0003-0293-5742

Supplementary Information

Table SI1: The PBE0  $\langle S^2 \rangle$  values following the ECP geometry optimisations and subsequent single point all electron calculations on  $AnCl_2$  ( $An=Th-No$ ). Data are reported as the difference between the formal and actual values. Accompanied by the 5f electron count and calculated electronic states and point group for both calculations.

| An | 5f electrons<br>$\alpha, \beta$ | Small core ECP | Electronic state<br>(point group) | All electron | Electronic State<br>(point group) |
|----|---------------------------------|----------------|-----------------------------------|--------------|-----------------------------------|
| Th | 2,0                             | 0.0046         | $^3B_2(C_{2v})$                   | 0.0044       | $^3A_2(C_{2v})$                   |
| Pa | 3,0                             | 0.0072         | $^4B_1(C_{2v})$                   | 0.0061       | $^4B_1(C_{2v})$                   |
| U  | 4,0                             | 0.0097         | $^5B_2(C_{2v})$                   | 0.0069       | $^5A_2(C_{2v})$                   |
| Np | 5,0                             | 0.0115         | $^6B_2(C_{2v})$                   | 0.0098       | $^6A_1(C_{2v})$                   |
| Pu | 6,0                             | 0.0147         | $^7B_1(C_{2v})$                   | 0.0132       | $^7B_1(C_{2v})$                   |
| Am | 7,0                             | 0.0137         | $^8A_2(C_{2v})$                   | 0.0138       | $^8A_2(C_{2v})$                   |
| Cm | 7,0                             | 0.0135         | $^9A_2(C_{2v})$                   | 0.0133       | $^9A_2(C_{2v})$                   |
| Bk | 7,1                             | 0.0100         | $^8B_2(C_{2v})$                   | 0.0104       | $^8A_2(C_{2v})$                   |
| Cf | 7,3                             | 0.0079         | $^5A_1(C_{2v})$                   | 0.0399       | $^5B_2(C_{2v})$                   |
| Es | 7,4                             | 0.0081         | $^4A_1(C_{2v})$                   | 0.0091       | $^4B_1(C_{2v})$                   |
| Fm | 7,5                             | 0.0028         | $^3B_1(C_{2v})$                   | 0.0031       | $^3A_1(C_{2v})$                   |
| Md | 7,6                             | 0.0007         | $^2B_2(C_{2v})$                   | 0.0006       | $^2B_2(C_{2v})$                   |
| No | 7,7                             | 0.0000         | $^1A_1(C_{2v})$                   | 0.0000       | $^1A_1(C_{2v})$                   |

Table S12: Average bond lengths (Å), Bond Angles (°) and Dihedral Angles (°) for AnCl<sub>2</sub> (where An=Th-No) with small core ECP for the PBE0 functional. Note that the geometries where the lower multiplicity (of 6 and 7) are used for CmCl<sub>2</sub> and BkCl<sub>2</sub> is represented by (*low m*).

| An                                    | Th    | Pa    | U     | Np    | Pu    | Am    | Cm    | Cm<br>( <i>low m</i> ) | Bk    | Bk<br>( <i>low m</i> ) | Cf    | Es    | Fm    | Md    | No    |
|---------------------------------------|-------|-------|-------|-------|-------|-------|-------|------------------------|-------|------------------------|-------|-------|-------|-------|-------|
| Average bond length AnCl <sub>2</sub> | 2.556 | 2.535 | 2.524 | 2.512 | 2.558 | 2.557 | 2.492 | 2.481                  | 2.476 | 2.543                  | 2.531 | 2.511 | 2.502 | 2.511 | 2.503 |
| Bond Angle AnCl <sub>2</sub>          | 158.6 | 110.4 | 116.7 | 117.0 | 116.3 | 112.5 | 121.5 | 115.6                  | 122.5 | 114.5                  | 116.5 | 118.6 | 119.4 | 129.7 | 120.8 |

Table SI3: An Natural populations in AnCl<sub>2</sub> (PBE0/all electron). (Note that (low m) represents where the lower multiplicity (of 6 and 7) are used for both the ECP geometry optimisation and single-point all electron calculation for CmCl<sub>2</sub> and BkCl<sub>2</sub>).

| An         | 5f    | 6d   | 7s   | 7p   |
|------------|-------|------|------|------|
| Th         | 0.36  | 1.80 | 0.83 | 0.03 |
| Pa         | 2.07  | 0.94 | 0.82 | 0.03 |
| U          | 3.13  | 0.84 | 0.83 | 0.04 |
| Np         | 4.59  | 0.59 | 0.58 | 0.03 |
| Pu         | 5.90  | 0.47 | 0.26 | 0.02 |
| Am         | 6.96  | 0.42 | 0.20 | 0.02 |
| Cm         | 7.07  | 0.80 | 0.85 | 0.01 |
| Bk         | 8.05  | 0.82 | 0.87 | 0.01 |
| Cf         | 9.93  | 0.38 | 0.26 | 0.02 |
| Es         | 10.98 | 0.37 | 0.21 | 0.02 |
| Fm         | 12.00 | 0.35 | 0.19 | 0.02 |
| Md         | 13.01 | 0.32 | 0.17 | 0.02 |
| No         | 13.99 | 0.32 | 0.21 | 0.02 |
| Cm (low m) | 7.13  | 0.68 | 0.91 | 0.06 |
| Bk (low m) | 8.63  | 0.45 | 0.55 | 0.03 |

Table SI4: The Wiberg Bond Index (WBI), QTAIM metrics (delocalisation Index  $\delta(\text{An,Cl})$ ,  $(-G/V)_{\text{BCP}}$  and bond critical point electron density ( $\rho_{\text{BCP}}$ ), all in au) for the An-Cl bond and NPA/QTAIM partial charge on the metal atom in AnCl<sub>2</sub>, where An=Th–No. (Note that (low m) represents where the lower multiplicity (of 6 and 7) are used for both the ECP geometry optimisation and single-point all electron calculation for CmCl<sub>2</sub> and BkCl<sub>2</sub>).

| An           | WBI  | NBO charge | $\delta(\text{An,Cl})$ | $(-G/V)_{\text{BCP}}$ | $\rho_{\text{BCP}}$ | QTAIM charge |
|--------------|------|------------|------------------------|-----------------------|---------------------|--------------|
| Th           | 0.86 | 1.05       | 1.02                   | 0.73                  | 0.082               | 1.34         |
| Pa           | 0.83 | 1.09       | 0.97                   | 0.74                  | 0.082               | 1.35         |
| U            | 0.80 | 1.13       | 0.98                   | 0.76                  | 0.082               | 1.35         |
| Np           | 0.75 | 1.18       | 0.99                   | 0.76                  | 0.084               | 1.33         |
| Pu           | 0.64 | 1.32       | 0.85                   | 0.80                  | 0.073               | 1.42         |
| Am           | 0.59 | 1.37       | 0.80                   | 0.83                  | 0.070               | 1.43         |
| Cm           | 0.73 | 1.20       | 0.94                   | 0.79                  | 0.082               | 1.34         |
| Bk           | 0.75 | 1.18       | 0.97                   | 0.79                  | 0.085               | 1.32         |
| Cf           | 0.58 | 1.38       | 0.79                   | 0.83                  | 0.072               | 1.43         |
| Es           | 0.57 | 1.40       | 0.77                   | 0.84                  | 0.072               | 1.43         |
| Fm           | 0.55 | 1.41       | 0.75                   | 0.85                  | 0.072               | 1.43         |
| Md           | 0.52 | 1.44       | 0.72                   | 0.86                  | 0.069               | 1.45         |
| No           | 0.53 | 1.43       | 0.72                   | 0.87                  | 0.068               | 1.45         |
| Cm (lower m) | 0.75 | 1.18       | 0.97                   | 0.78                  | 0.083               | 1.32         |
| Bk (lower m) | 0.64 | 1.31       | 0.86                   | 0.82                  | 0.072               | 1.40         |

Table S15: The Enthalpy of Reaction/  $\text{kJ mol}^{-1}$  (all electron calculations for all bar PBE0 ECP) Note that for Cm and Bk the parenthesised values are the enthalpy values when the dichloride frequency calculation was performed with the lower multiplicity (of 6 and 7 respectively) .

| Functional | Th     | Pa     | U      | Np     | Pu     | Am     | Cm                 | Bk                 | Cf     | Es     | Fm     | Md     | No    |
|------------|--------|--------|--------|--------|--------|--------|--------------------|--------------------|--------|--------|--------|--------|-------|
| PBE0       | 429.74 | 393.85 | 326.39 | 401.67 | 328.32 | 225.28 | 348.03<br>(390.01) | 379.12<br>(362.37) | 280.48 | 220.00 | 151.34 | 62.24  | 13.82 |
| PBE        | 425.85 | 389.77 | 373.62 | 346.95 | 292.27 | 216.50 | 322.34<br>(360.80) | 341.81<br>(305.98) | 239.27 | 199.82 | 161.16 | 107.87 | 60.94 |
| B3Pw91     |        | 396.06 | 363.93 | 395.34 |        |        | 341.77             | 369.32<br>(333.48) |        |        |        |        |       |
| BLYP       |        | 382.15 | 362.86 | 337.68 |        |        | 333.02             | 332.63<br>(296.74) |        |        |        |        |       |
| B3LYP      |        | 389.91 | 361.48 | 361.26 |        |        | 341.77             | 376.33<br>(345.08) |        |        |        |        |       |
| PBE0 ECP   |        |        |        |        |        |        | 344.15             | 345.90             |        |        |        |        |       |

### The origin of the peak at Bk for the enthalpy of reaction in Figure 3

In Figure 3 (which shows the enthalpy data of the following reaction -  $\text{AnCl}_3 \rightarrow \text{AnCl}_2 + \frac{1}{2} \text{Cl}_2$  (An=Th-No)) there is a peak at Bk with the PBE0 functional, and a plateau with the PBE functional. This trend does not match previous experimental and theoretical work, which has the peak located at Cm - and moreover, cannot be explained chemically. As highlighted in the computational details, both  $\text{CmCl}_2$  and  $\text{BkCl}_2$  were calculated with higher multiplicities, (due to high spin contamination with the lower multiplicities) which forced population of their 6d and 7s orbitals. For the ECP geometry optimisation calculations both  $\text{CmCl}_2$  and  $\text{BkCl}_2$  produced a lower energy geometry with this higher multiplicity. However, for the single point all electron calculation,  $\text{BkCl}_2$  the higher multiplicity was in fact higher in energy (by 17  $\text{kJ mol}^{-1}$ ). Thus, the higher enthalpy value shown in Figure S11 below for a range of functions, may have arisen due to the higher energy calculated using all-electron approach for  $\text{BkCl}_2$  – suggesting that the correct ground state is not described with this higher multiplicity for the all-electron calculation, unlike  $\text{CmCl}_2$ . However, as shown below in Figure S11 with PBE0, even though (unlike the all-electron calculation) there isn't a peak at Bk when the enthalpy values calculated using ECPs, there is still not a significant peak in enthalpy at Cm.

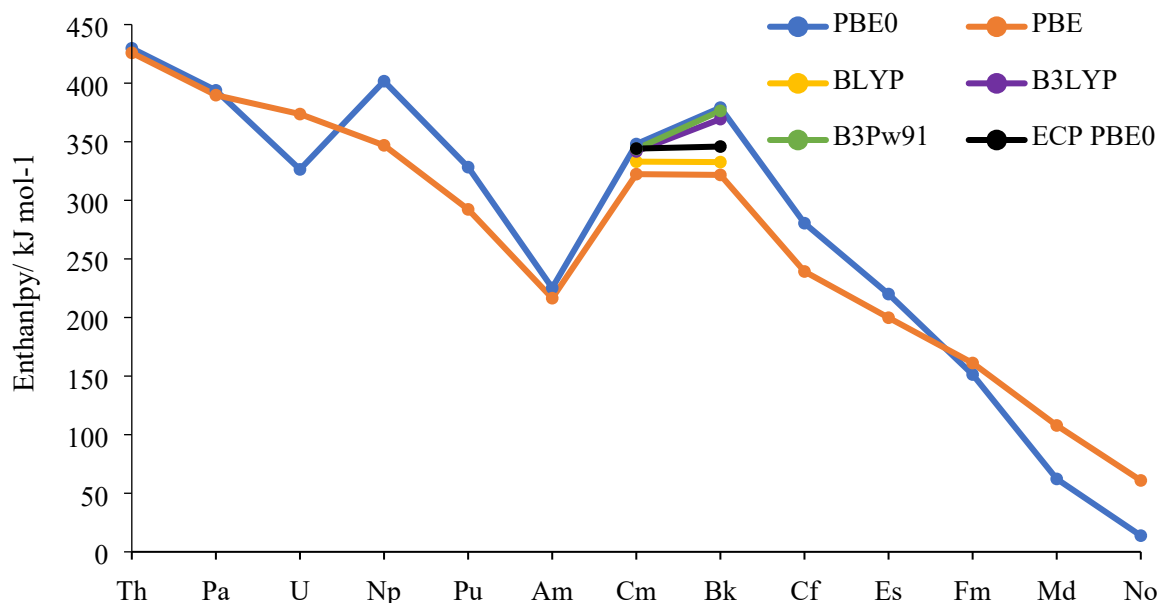

Figure S11: The enthalpy of reaction of the following reaction:  $\text{AnCl}_3 \rightarrow \text{AnCl}_2 + \frac{1}{2} \text{Cl}_2$  (An=Th-No) for a range of functionals (blue/purple/green for the hybrid functionals, yellow/orange for the GGA functionals and black for the PBE0 ECP data). Each geometry was optimised with the corresponding functional and then single point all electron calculation performed (except PBE0 ECP).

Therefore, to further investigate the effect of multiplicity, we re-ran the frequency calculation for  $\text{BkCl}_2$  (for the same range of functionals and ECP geometries as above) but with the original lower multiplicity, of 6 instead of 8, for the single point calculation - which note produced highly spin contaminated systems with all functionals. As shown in Figure S12, this change lowered the enthalpy of reaction value for Bk for each functional; with the GGA's now in good agreement with the previous studies.

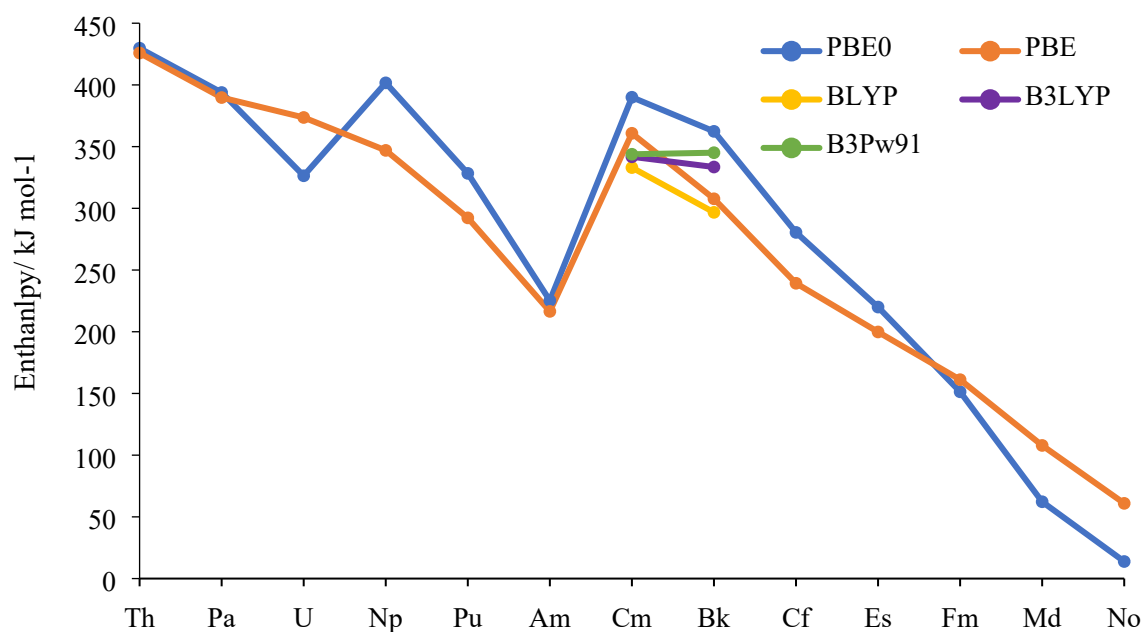

Figure S12: The enthalpy of the following reaction:  $\text{AnCl}_3 \rightarrow \text{AnCl}_2 + \frac{1}{2} \text{Cl}_2$  ( $\text{An}=\text{Th}-\text{No}$ ) for a range of functionals (blue/purple/green for the hybrid functionals and yellow/orange for the GGA functionals), with  $\text{BkCl}_2$  possessing a multiplicity of 6 instead of 8 in the main paper in the all-electron calculation. The geometry is the same as above in Figure 1.

Note that when a multiplicity of 6 is used for both the ECP geometry optimisation and all electron single-point calculation, Bk no longer has: population of the 6d orbital (see Table S13), a bond length (see Table S11 and Figure S13 below) and An-Cl covalency (see Table S14 and the Delocalisation Index in Figure S14 below) which is in line with the earlier actinides. This supports the suggestion in the main paper, that the longer bond lengths and increased covalency of elements Th-Np, Cm and Bk are caused by the increase population of the 6d orbital.

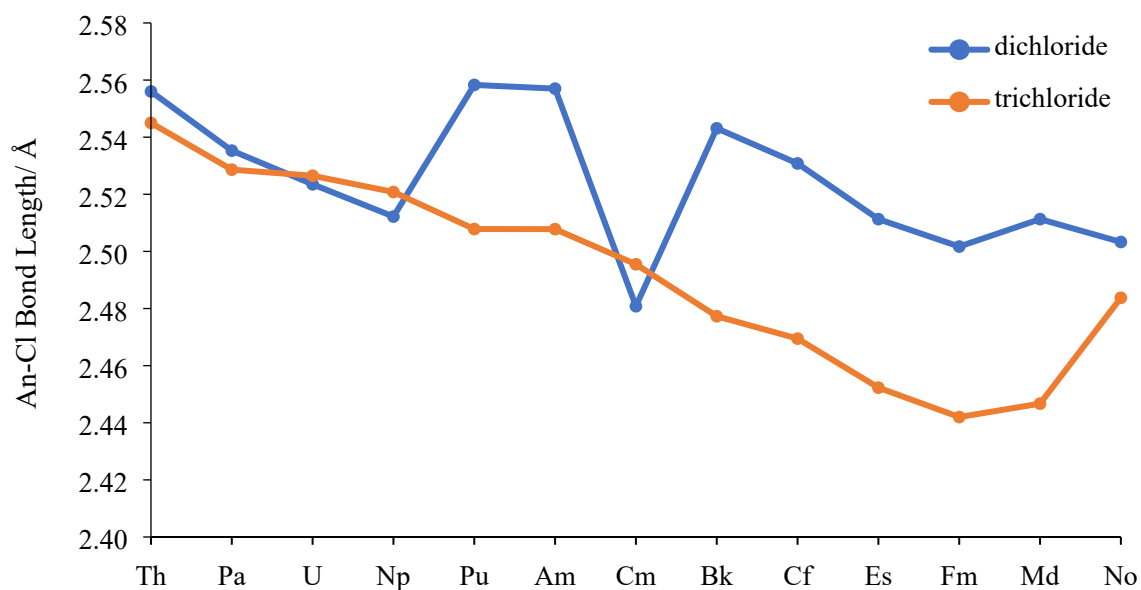

Figure S13 - An-Cl bond lengths in  $\text{AnCl}_2$  (compared to  $\text{AnCl}_3$  from our previous work<sup>27</sup>) where  $\text{CmCl}_2$  and  $\text{BkCl}_2$  has a multiplicity of 7 and 6 respectively.

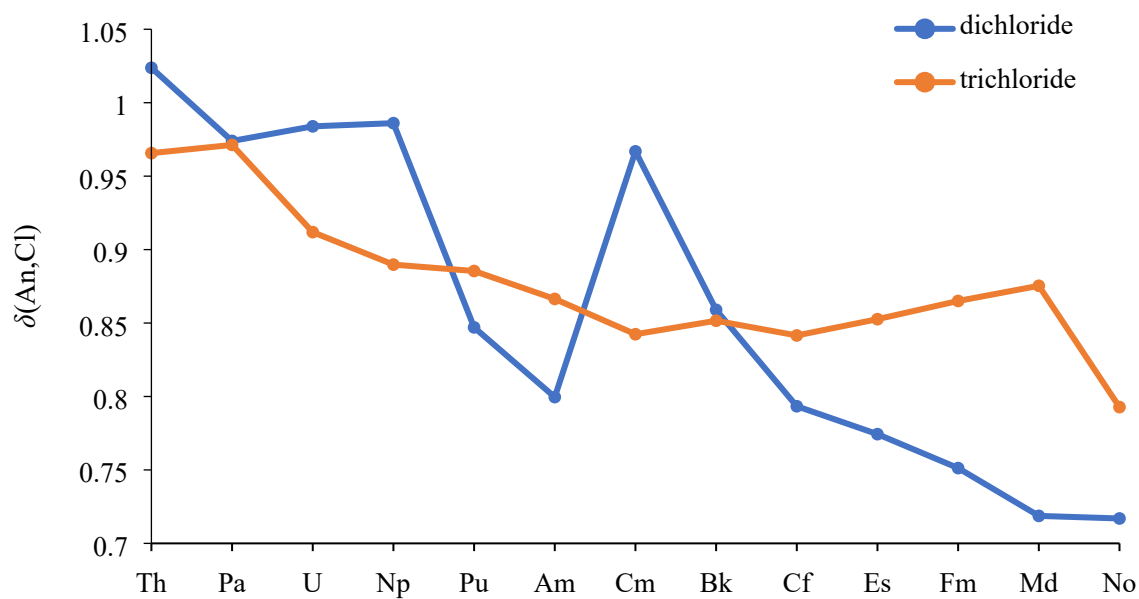

Figure S14: The An-Cl Delocalisation Index  $\delta(\text{An,Cl})$  for  $\text{AnCl}_2$  (compared to  $\text{AnCl}_3$  from our previous work<sup>27</sup>) when  $\text{CmCl}_2$  and  $\text{BkCl}_2$  has a multiplicity of 7 and 6 respectively in both the ECP geometry optimisation and all electron calculation.



Table S16: NRT analysis; average  $\alpha$  and  $\beta$  spin covalent, ionic and ionic/covalent An-Cl Natural bond orders in  $\text{AnCl}_2$  (An=Th–Md)

| An | $\alpha$ covalent | $\alpha$ ionic | $\alpha$ ionic/covalent | $\beta$ covalent | $\beta$ ionic | $\beta$ ionic/covalent |
|----|-------------------|----------------|-------------------------|------------------|---------------|------------------------|
| Th | 0.21              | 1.20           | 5.85                    | 0.19             | 1.27          | 6.70                   |
| Pa | 0.22              | 1.23           | 5.56                    | 0.19             | 1.21          | 6.40                   |
| U  | 0.21              | 1.24           | 5.95                    | 0.14             | 0.86          | 6.08                   |
| Np | 0.21              | 1.24           | 5.84                    | 0.12             | 0.88          | 7.04                   |
| Pu | 0.13              | 0.87           | 6.66                    | 0.10             | 0.90          | 9.09                   |
| Am | 0.12              | 0.88           | 7.16                    | 0.10             | 0.90          | 9.36                   |
| Cm | 0.16              | 1.06           | 6.60                    | 0.14             | 0.86          | 6.29                   |
| Bk | 0.16              | 1.07           | 6.78                    | 0.19             | 1.24          | 6.64                   |
| Cf | 0.11              | 0.89           | 8.30                    | 0.11             | 0.89          | 8.30                   |
| Es | 0.10              | 0.90           | 8.77                    | 0.10             | 0.90          | 8.64                   |
| Fm | 0.10              | 0.90           | 9.20                    | 0.10             | 0.90          | 8.82                   |
| Md | 0.09              | 0.91           | 10.47                   | 0.10             | 0.90          | 9.33                   |

Table S17: Metal contribution (%) to the An–Cl bonding NBOs (as  $\text{NoCl}_2$  has a full shell, the NBOs are not divided into  $\alpha$  and  $\beta$  spin, hence the  $\alpha$   $\sigma$  and  $\pi$  represent the total  $\sigma$  and  $\pi$  m%)

| An | Average | $\alpha$ $\sigma$ | $\alpha$ $\pi$ | $\beta$ $\sigma$ | $\beta$ $\pi$ |
|----|---------|-------------------|----------------|------------------|---------------|
| Th | 7.88    | 9.73              | 6.35           | 9.80             | 5.62          |
| Pa | 8.50    | 11.69             | 6.40           | 10.82            | 5.10          |
| U  | 8.27    | 11.75             | 5.96           | 10.51            | 4.84          |
| Np | 7.72    | 11.76             | 5.67           | 9.31             | 4.14          |
| Pu | 6.19    | 9.33              | 4.62           | 7.31             | 3.48          |
| Am | 6.00    | 9.29              | 4.18           | 7.15             | 3.39          |
| Cm | 7.58    | 10.36             | 5.22           | 10.32            | 4.43          |
| Bk | 7.78    | 9.99              | 5.23           | 10.8             | 5.07          |
| Cf | 5.85    | 8.31              | 3.51           | 8.23             | 3.36          |
| Es | 5.64    | 7.88              | 3.35           | 7.73             | 3.58          |
| Fm | 5.47    | 7.53              | 3.17           | 7.52             | 3.64          |
| Md | 4.98    | 6.65              | 2.87           | 6.46             | 3.94          |
| No | 5.21    | 7.42              | 2.99           | -                | -             |

Table S18: NAO contribution (%) to the  $\sigma$   $\alpha$  An-Cl bonding NBOs (as  $\text{NoCl}_2$  has a full shell, the NBOs are not divided into  $\alpha$  and  $\beta$  spin, hence the  $\alpha$   $\sigma$  and  $\pi$  represent the total  $\sigma$  and  $\pi$  m%).

| An | s    | p    | d    | f    |
|----|------|------|------|------|
| Th | 0.81 | 0.18 | 4.96 | 3.71 |
| Pa | 1.39 | 0.03 | 8.50 | 1.76 |
| U  | 1.48 | 0.03 | 8.40 | 1.84 |
| Np | 2.87 | 0.03 | 7.05 | 1.80 |
| Pu | 3.27 | 0.03 | 5.34 | 0.67 |
| Am | 3.50 | 0.03 | 5.46 | 0.28 |
| Cm | 1.36 | 0.06 | 8.86 | 0.06 |
| Bk | 1.38 | 0.06 | 8.49 | 0.06 |
| Cf | 3.40 | 0.03 | 4.80 | 0.06 |
| Es | 3.24 | 0.03 | 4.53 | 0.06 |
| Fm | 3.07 | 0.04 | 4.36 | 0.04 |
| Md | 2.67 | 0.05 | 3.87 | 0.03 |
| No | 3.20 | 0.04 | 4.10 | 0.04 |

Table S19: NAO contribution (%) to the  $\sigma$   $\beta$  An-Cl bonding NBOs.

| An | s    | p    | d    | f    |
|----|------|------|------|------|
| Th | 1.54 | 0.06 | 4.05 | 4.08 |
| Pa | 2.77 | 0.03 | 6.51 | 1.50 |
| U  | 2.72 | 0.02 | 6.18 | 1.57 |
| Np | 2.72 | 0.03 | 5.28 | 1.27 |
| Pu | 2.14 | 0.02 | 4.19 | 0.95 |
| Am | 2.32 | 0.02 | 3.90 | 0.90 |
| Cm | 3.01 | 0.02 | 5.65 | 1.62 |
| Bk | 3.84 | 0.02 | 5.59 | 1.33 |
| Cf | 3.24 | 0.03 | 4.15 | 0.80 |
| Es | 3.07 | 0.03 | 4.04 | 0.57 |
| Fm | 3.01 | 0.03 | 3.85 | 0.62 |
| Md | 2.73 | 0.06 | 3.26 | 0.38 |

Table SI10: NAO contribution (%) to the  $\pi \alpha$  An-Cl bonding NBOs (as  $\text{NoCl}_2$  has a full shell, the NBOs are not divided into  $\alpha$  and  $\beta$  spin, hence the  $\alpha \sigma$  and  $\pi$  represent the total  $\sigma$  and  $\pi$  m%).

| An | s    | p    | d    | f    |
|----|------|------|------|------|
| Th | 0.00 | 0.41 | 3.09 | 2.82 |
| Pa | 0.00 | 0.27 | 4.37 | 1.75 |
| U  | 0.00 | 0.37 | 4.62 | 0.96 |
| Np | 0.00 | 0.30 | 4.70 | 0.67 |
| Pu | 0.01 | 0.23 | 3.69 | 0.68 |
| Am | 0.00 | 0.39 | 3.73 | 0.05 |
| Cm | 0.00 | 0.46 | 4.68 | 0.07 |
| Bk | 0.00 | 0.51 | 4.63 | 0.07 |
| Cf | 0.00 | 0.40 | 3.05 | 0.05 |
| Es | 0.00 | 0.42 | 2.87 | 0.05 |
| Fm | 0.00 | 0.43 | 2.67 | 0.06 |
| Md | 0.00 | 0.51 | 2.28 | 0.07 |
| No | 0.00 | 0.45 | 2.47 | 0.06 |

Table SI11: NAO contribution (%) to the  $\pi \beta$  An-Cl bonding NBOs.

| An | s    | p    | d    | f    |
|----|------|------|------|------|
| Th | 0.00 | 0.25 | 2.96 | 2.39 |
| Pa | 0.00 | 0.16 | 3.46 | 1.46 |
| U  | 0.00 | 0.20 | 3.30 | 1.33 |
| Np | 0.00 | 0.17 | 2.95 | 1.02 |
| Pu | 0.00 | 0.23 | 2.51 | 0.74 |
| Am | 0.00 | 0.25 | 2.53 | 0.61 |
| Cm | 0.00 | 0.22 | 3.02 | 1.18 |
| Bk | 0.00 | 0.24 | 3.15 | 1.67 |
| Cf | 0.00 | 0.38 | 2.65 | 0.32 |
| Es | 0.02 | 0.19 | 2.45 | 0.91 |
| Fm | 0.01 | 0.19 | 2.38 | 1.04 |
| Md | 0.04 | 0.22 | 2.10 | 1.58 |

Table S112: The average energy difference between the  $\alpha$  and  $\beta$  5f and 3p, and 6d and 3p NAOs and the  $\beta$  An and Cl NHOs (Hartrees) in  $\text{AnCl}_2$  (An = Pu-Md, PBE0/all electron).

| An                   | Pu    | Am    | Cm     | Bk     | Cf     | Es     | Fm     | Md     |
|----------------------|-------|-------|--------|--------|--------|--------|--------|--------|
| f NAO $\alpha$       | 0.127 | 0.070 | -0.084 | -0.116 | -0.002 | -0.007 | -0.016 | -0.024 |
| f NAO $\beta$        | 0.380 | 0.386 | 0.263  | 0.204  | 0.224  | 0.149  | 0.092  | 0.028  |
| d NAO $\alpha$       | 0.279 | 0.279 | 0.257  | 0.262  | 0.300  | 0.306  | 0.321  | 0.331  |
| d NAO $\beta$        | 0.330 | 0.329 | 0.322  | 0.316  | 0.318  | 0.323  | 0.328  | 0.330  |
| $\sigma$ NHO $\beta$ | –     | 0.471 | 0.436  | 0.417  | 0.414  | 0.401  | 0.412  | 0.400  |
| $\pi$ NHO $\beta$    | –     | 0.338 | 0.310  | 0.286  | 0.324  | 0.340  | 0.338  | 0.321  |

Table S113: NHO overlap for  $\text{AnCl}_2$  (An=Th-Md, PBE0/all electron). (As  $\text{NoCl}_2$  has a full shell, the NHOs are not divided into  $\alpha$  and  $\beta$  spin, hence the  $\alpha$   $\sigma$  and  $\pi$  represent the total  $\sigma$  and  $\pi$ ).

| An | $\alpha$ $\sigma$ | $\alpha$ $\pi$ | $\beta$ $\sigma$ | $\beta$ $\pi$ |
|----|-------------------|----------------|------------------|---------------|
| Th | 0.55              | 0.55           | 0.57             | 0.51          |
| Pa | 0.56              | 0.52           | 0.58             | 0.52          |
| U  | 0.54              | 0.45           | 0.56             | 0.47          |
| Np | 0.53              | 0.43           | 0.55             | 0.44          |
| Pu | 0.54              | 0.42           | 0.53             | 0.43          |
| Am | 0.54              | 0.42           | 0.53             | 0.43          |
| Cm | 0.54              | 0.42           | 0.53             | 0.42          |
| Bk | 0.54              | 0.42           | 0.53             | 0.40          |
| Cf | 0.54              | 0.43           | 0.52             | 0.43          |
| Es | 0.54              | 0.44           | 0.51             | 0.42          |
| Fm | 0.55              | 0.44           | 0.54             | 0.44          |
| Md | 0.55              | 0.45           | 0.53             | 0.39          |
| No | 0.54              | 0.42           | –                | –             |

## Dichlorides

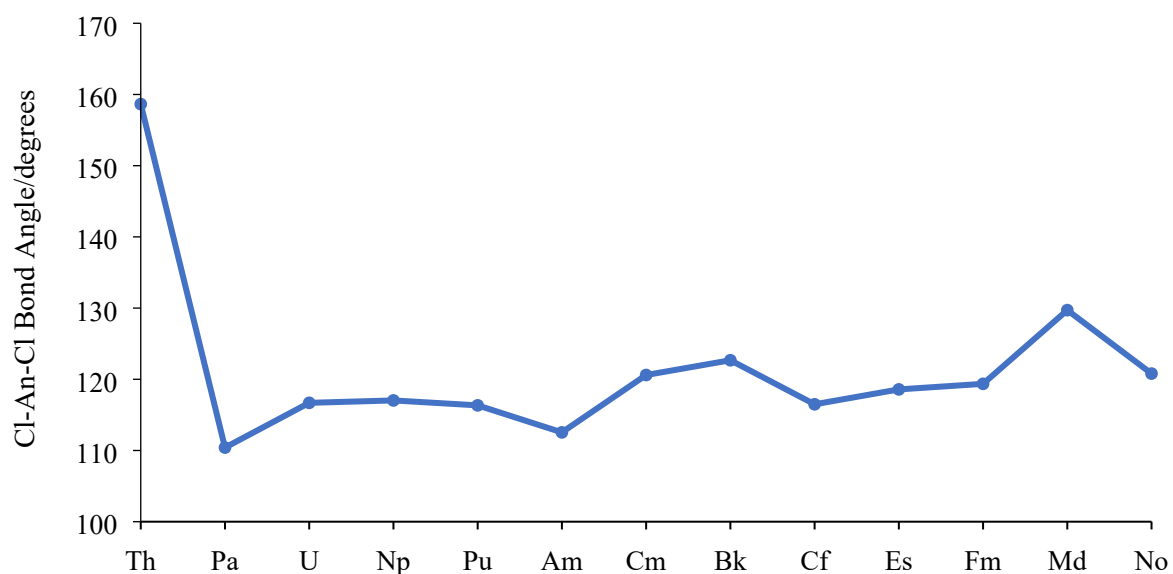

Figure S15 – The Cl-An-Cl bond angle for  $AnCl_2$  ( $An=Th-No$ )

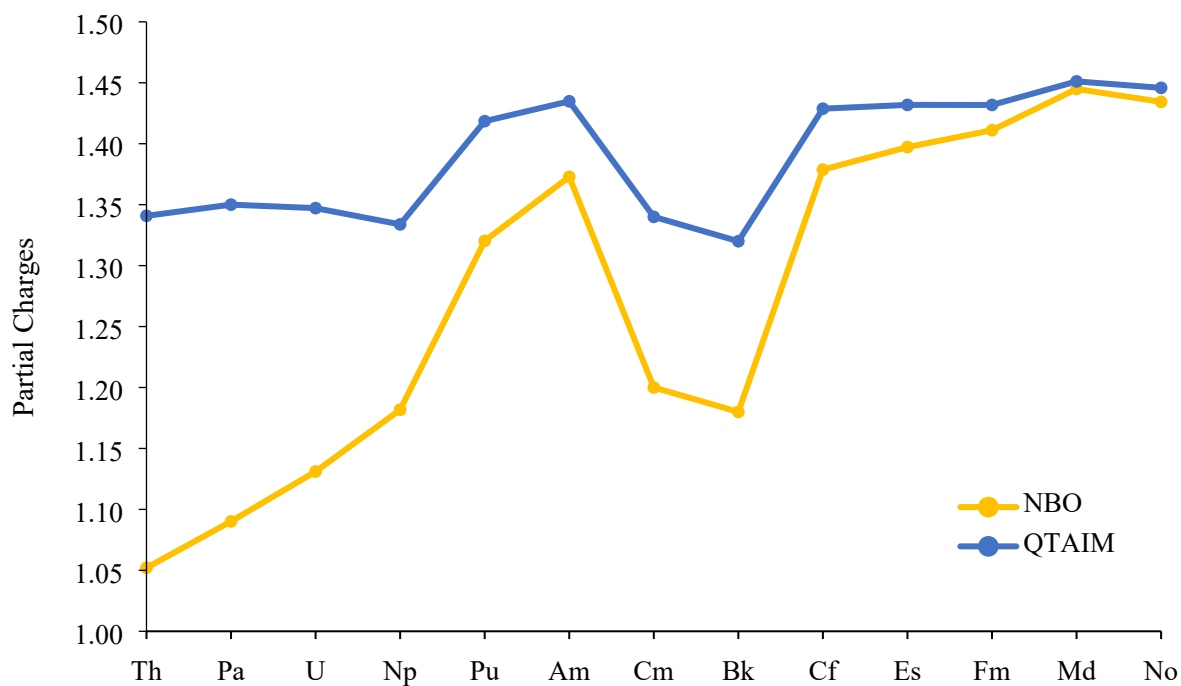

Figure S16- The NBO and QTAIM partial charges for  $AnCl_2$  ( $An=Th-No$ )

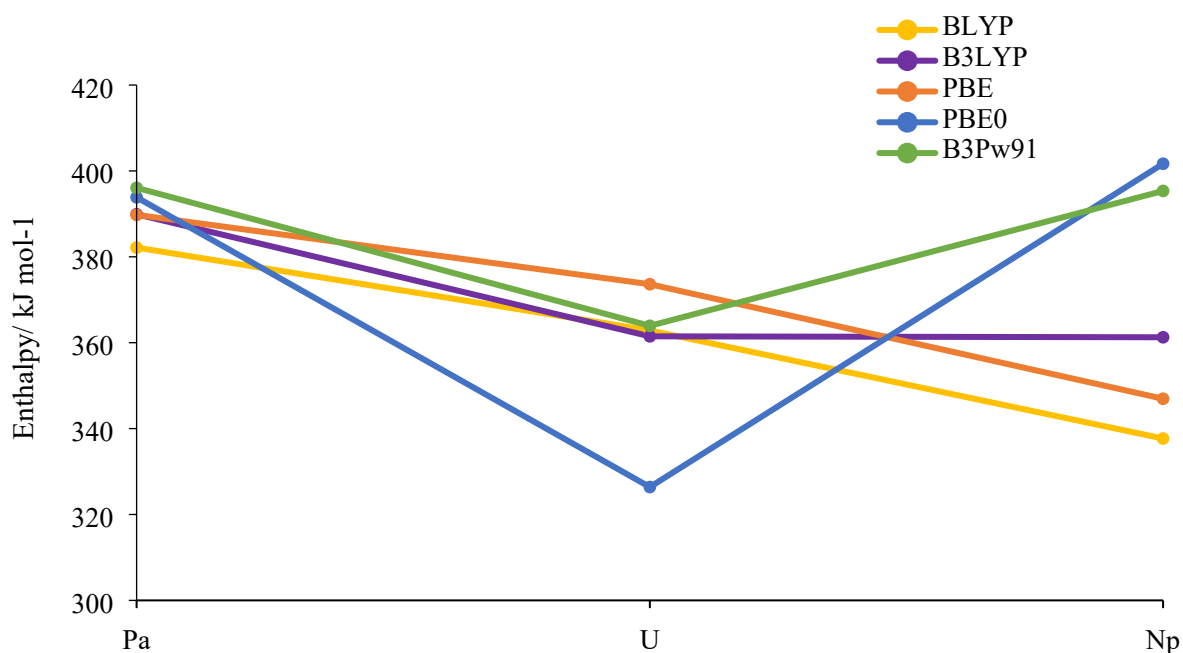

Figure SI7- The enthalpy for  $AnCl_2$   $An=Pa-Np$  for a range of functionals - blue/green for the hybrids and yellow/orange for the GGAs. (Note, that both the ECP geometry optimisation and the all-electron frequency calculations were performed with the corresponding functional).

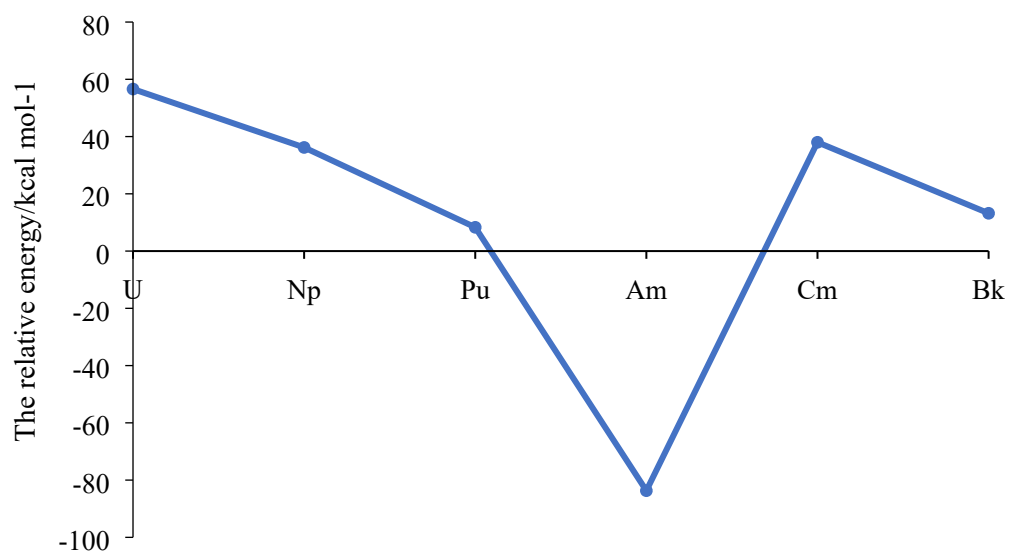

Figure SI8 – The relative  $\Delta H_{0K} AnO_2^{2+}$  in  $kcal\ mol^{-1}$  (at CCSD(T)/(a)VTZ-DK level) for III and II oxidation states (III-II), created from the data in Vasiliu *et al.*'s work.<sup>31</sup>

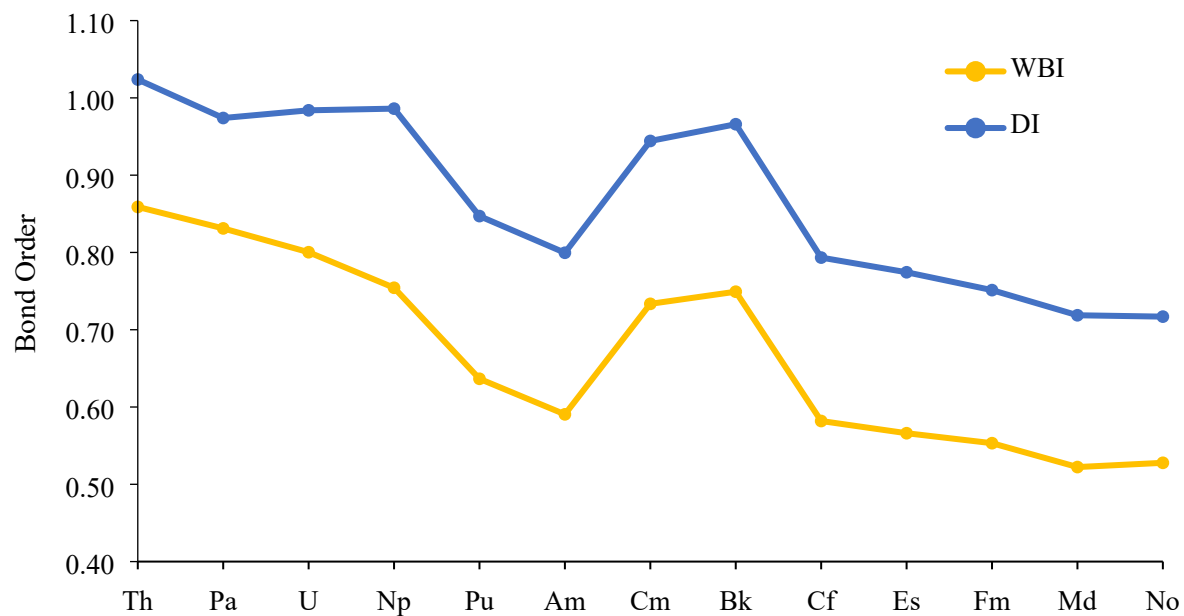

Figure S19- The An-Cl Wiberg Bond Index (WBI) and Delocalisation Index (DI or  $\delta(\text{An,Cl})$ ) for  $\text{AnCl}_2$  (An=Th-No).

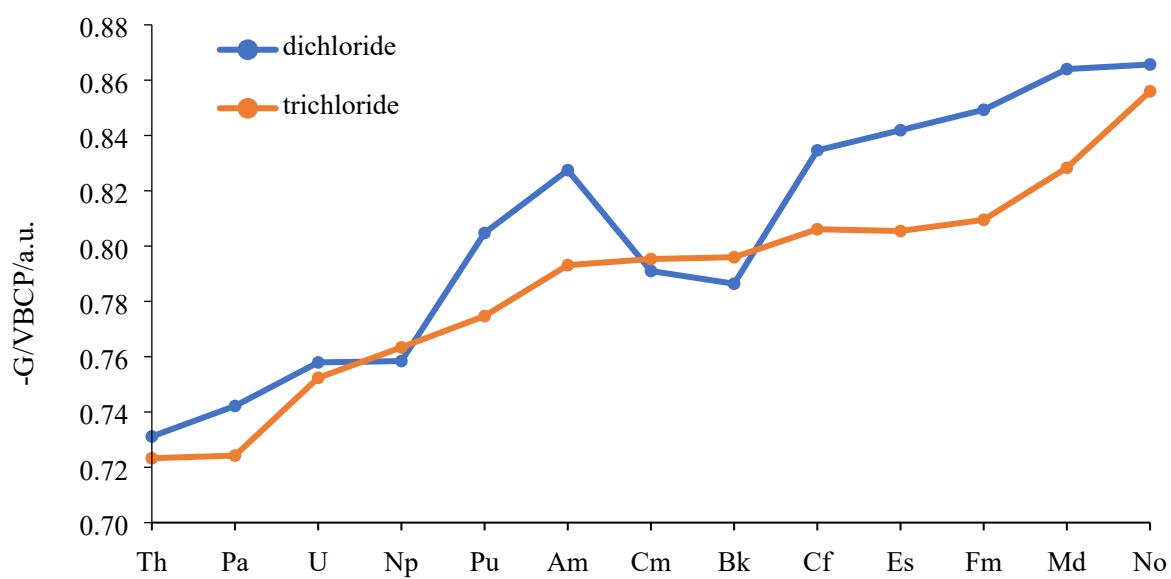

Figure S110-  $(-G/V)_{\text{BCP}}$  for  $\text{AnCl}_2$  and  $\text{AnCl}_3^{27}$  (An=Th-No)

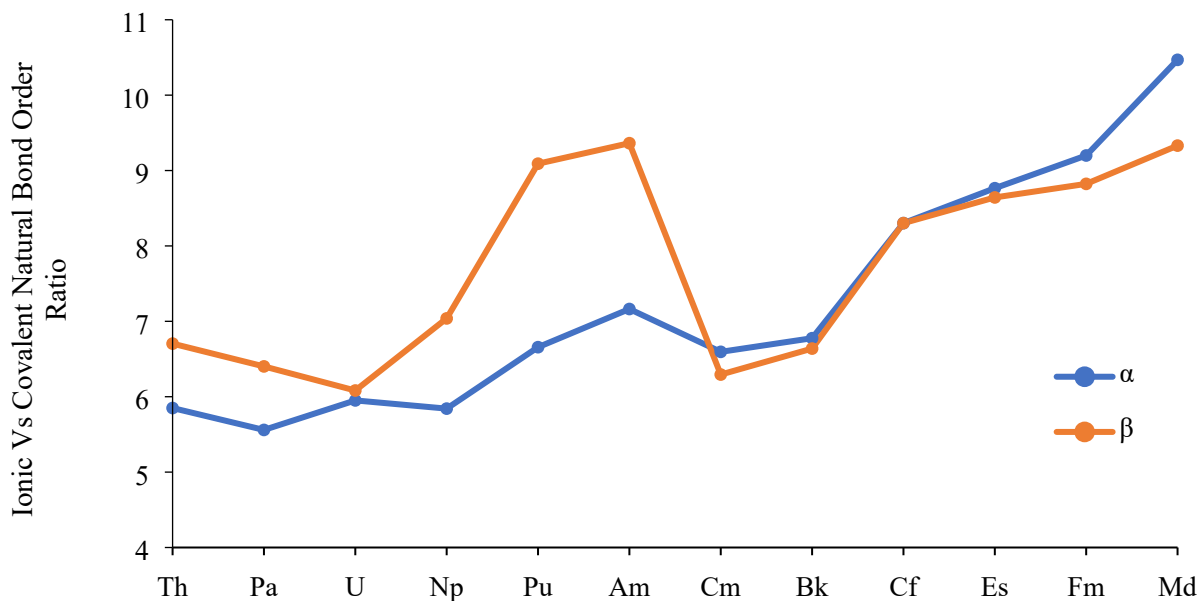

Figure S111- The ratio of the ionic to covalent contributions to the  $\alpha$  and  $\beta$  natural bond order in  $AnCl_2$  (An=Th-Md).

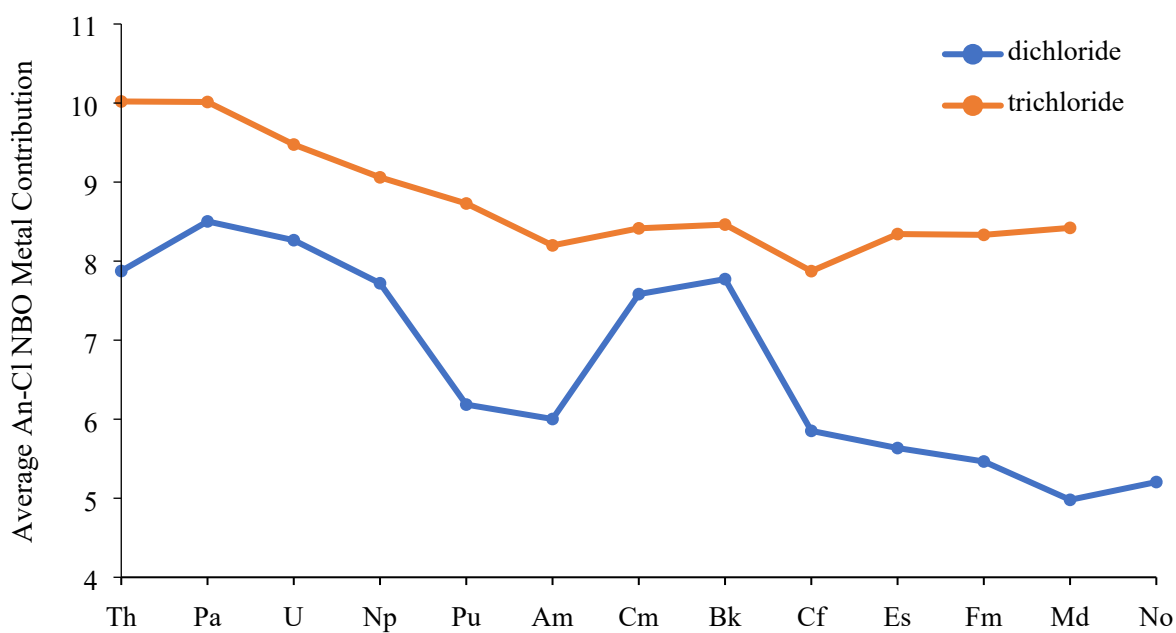

Figure S112- The Average metal contribution (%) to the metal-chlorine NBOs in  $AnCl_2$  and  $AnCl_3$ .  $NoCl_3$  is omitted as it did not converge on  $\sigma$  type +  $\pi$  type NBOs for all three An-Cl bonds.



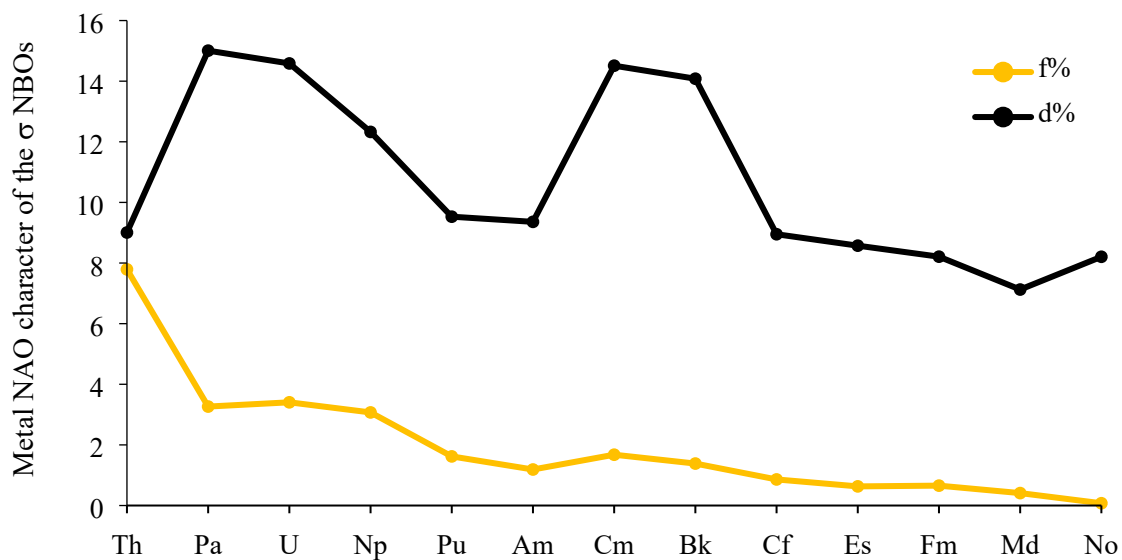

(a)  $\sigma$ -type

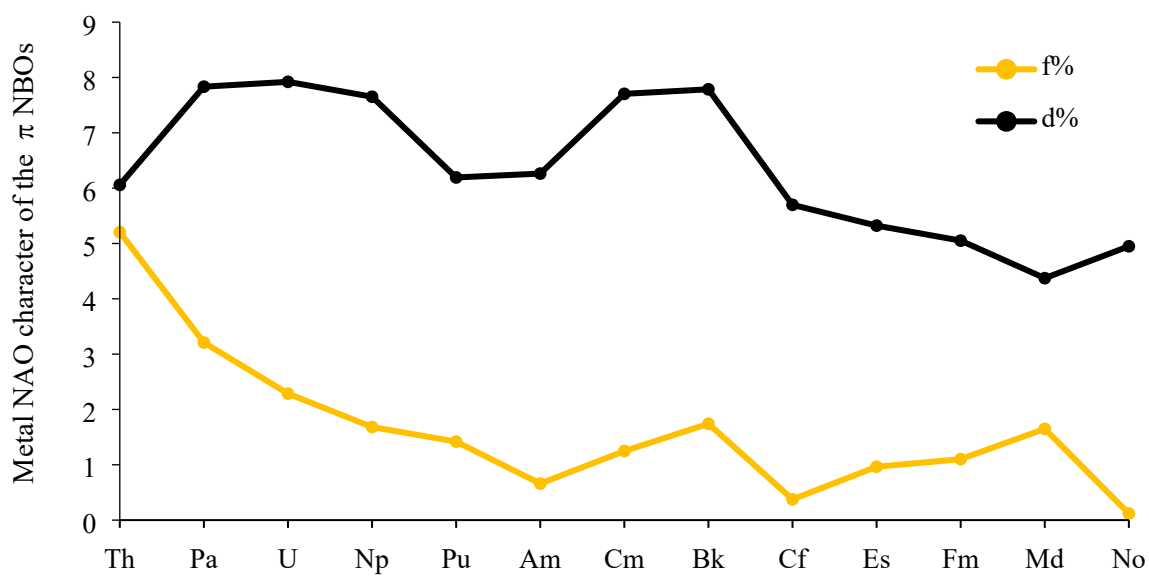

(b)  $\pi$ -type

Figure S113 - Actinide d and f natural atomic orbital contributions (%) to the (a)  $\sigma$  type and (b)  $\pi$  type NBOs for  $AnCl_2$  – the  $\alpha$  and  $\beta$  values have been averaged for  $An = Th-Md$ .

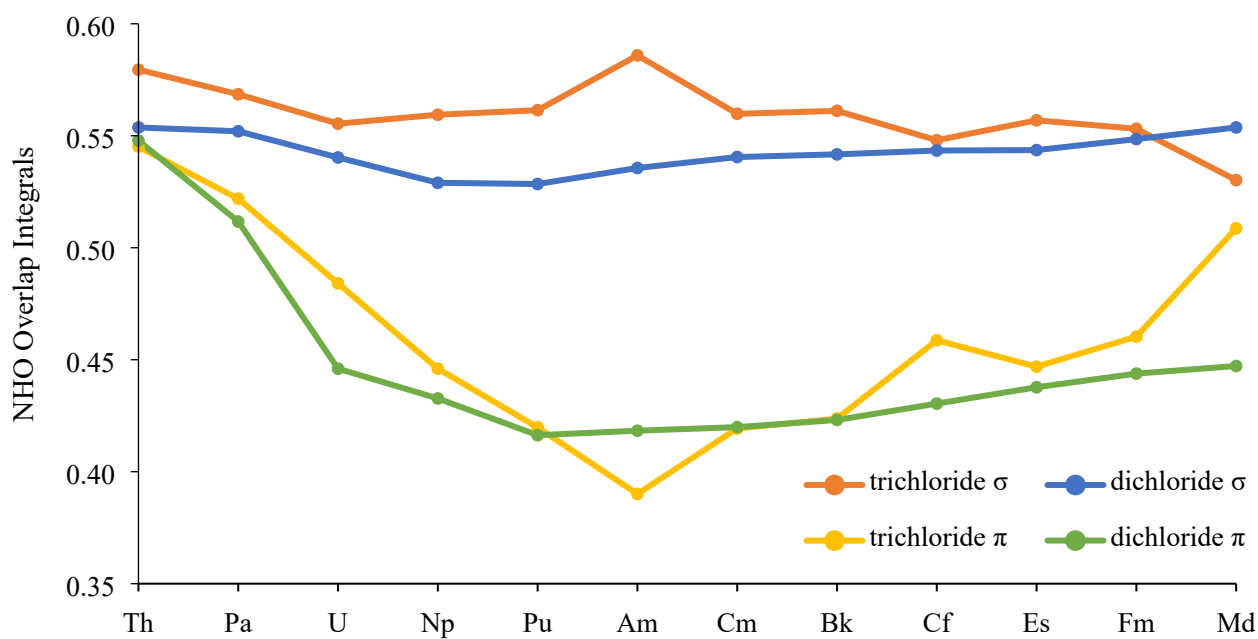

(a)  $\alpha$

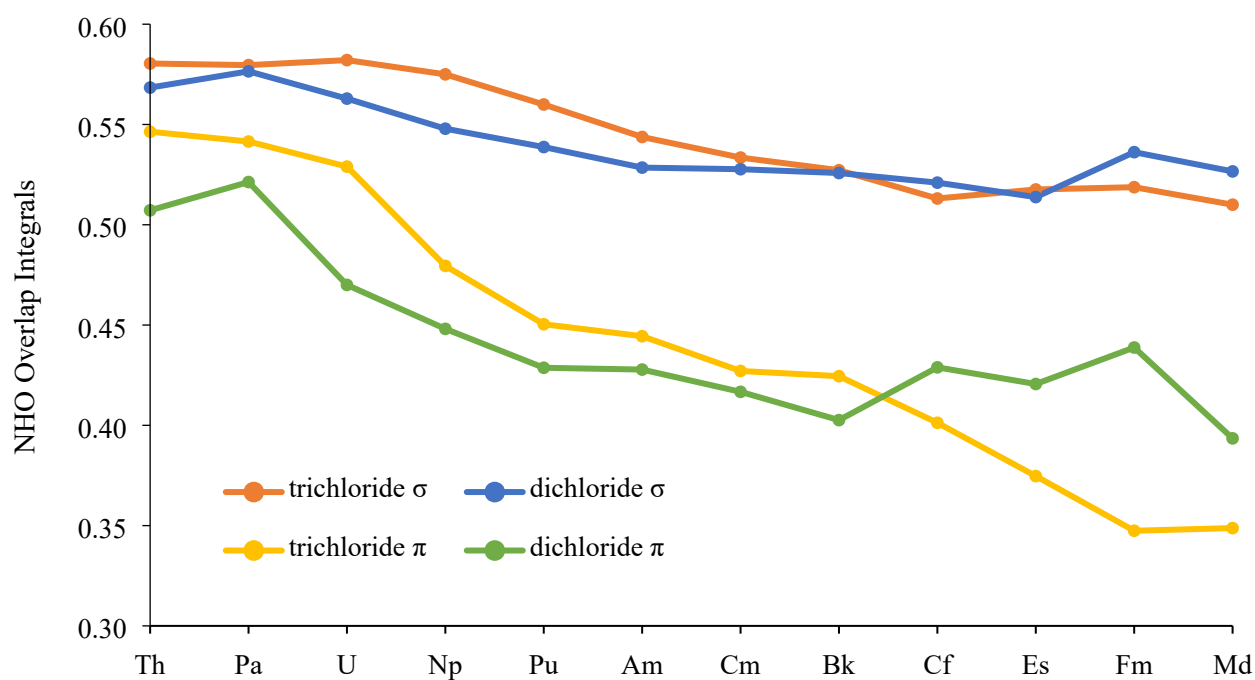

(b)  $\beta$

Figure SI14- The overlap of the metal and chlorine Natural Hybrid Orbitals in  $AnCl_2$  and  $AnCl_3$ <sup>27</sup> ( $An = Th-Md$ ) for the  $\alpha$  (a) and  $\beta$  spin (b). No is omitted as it did not converge on  $\sigma$  type +  $\pi$  type NBO for all three An-Cl bonds for  $NoCl_3$ .

## Trichlorides

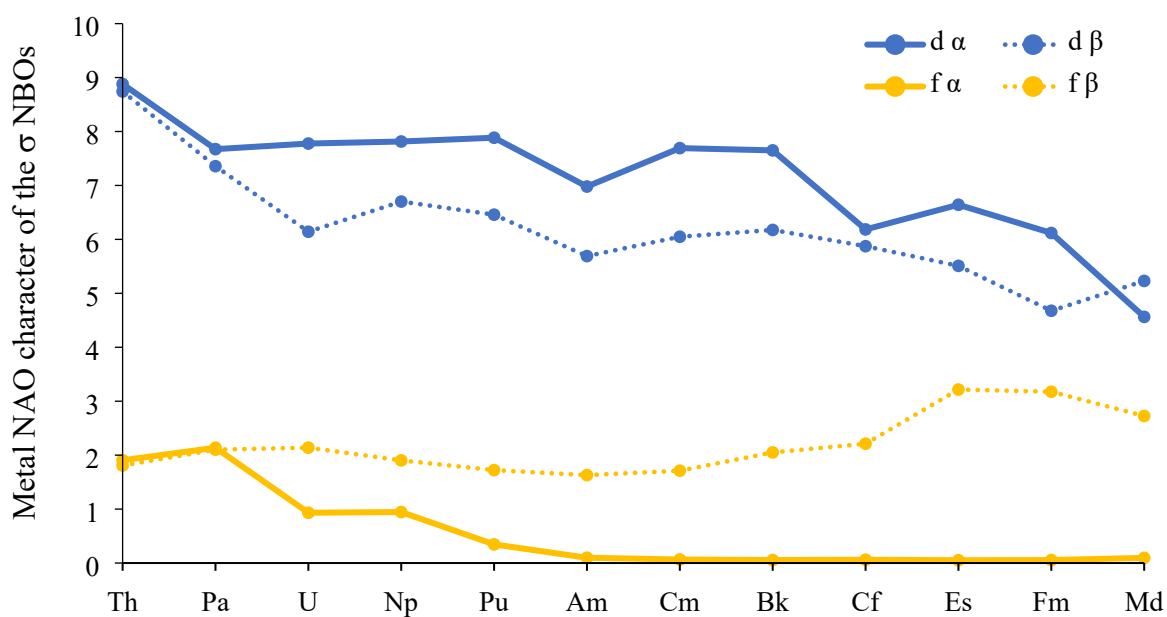

(a)  $\sigma$ -type

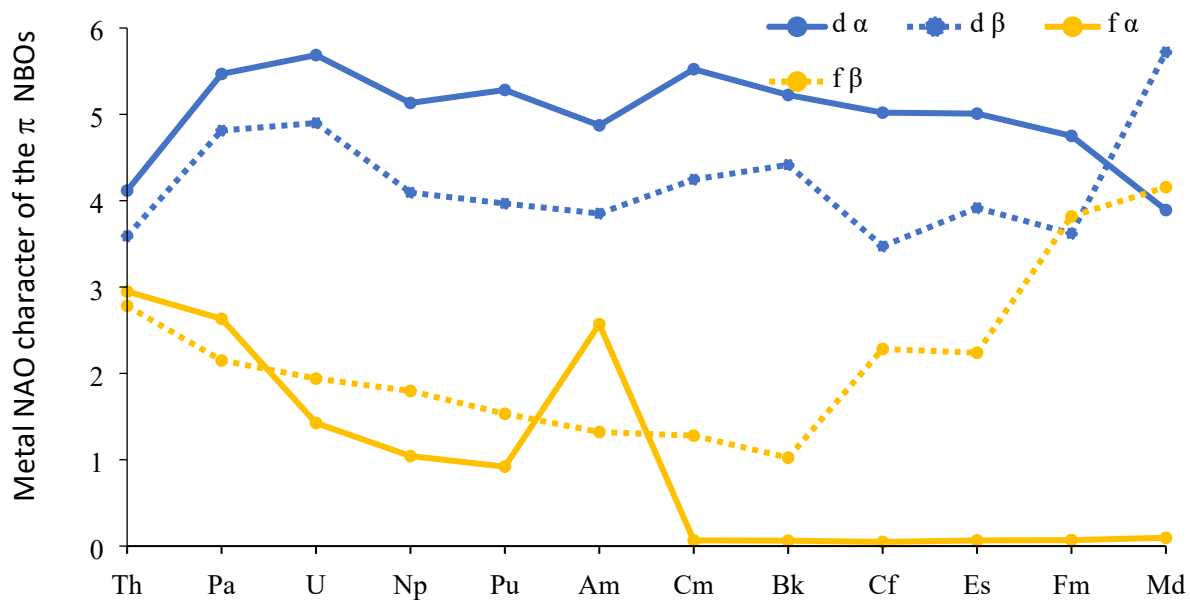

(b)  $\pi$ -type

Figure SI15 - Actinide d and f natural atomic orbital contributions (%) to the (a)  $\sigma$  type and (b)  $\pi$  type NBOs for  $AnCl_3$ .  $NoCl_3$  is omitted as it did not converge on  $\sigma$  type +  $\pi$  type NBO for all three  $An-Cl$  bonds. From previous work<sup>27</sup>

## XYZ

|    |            |             |             |
|----|------------|-------------|-------------|
| Th | 0.00000000 | 0.00000000  | 0.12983900  |
| Cl | 0.00000000 | 2.51176200  | -0.34369100 |
| Cl | 0.00000000 | -2.51176200 | -0.34369100 |
| U  | 0.00000000 | 0.00000000  | 0.44021000  |
| Cl | 0.00000000 | 2.14811000  | 0.88406600  |
| Cl | 0.00000000 | -2.14811000 | 0.88406600  |
| Pa | 0.00000000 | 0.00000000  | 0.39352400  |
| Cl | 0.00000000 | 2.08191700  | -1.05325500 |
| Cl | 0.00000000 | -2.08191700 | -1.05325500 |
| Np | 0.00000000 | 0.00000000  | 0.39381700  |
| Cl | 0.00000000 | 2.04550200  | -1.07720500 |
| Cl | 0.00000000 | -2.04550200 | -1.07720500 |
| Pu | 0.00000000 | 0.00000000  | 0.35839800  |
| Cl | 0.00000000 | 2.17351200  | -0.99086600 |
| Cl | 0.00000000 | -2.17351200 | -0.99086600 |
| Am | 0.00000000 | 0.00000000  | 0.37420100  |
| Cl | 0.00000000 | 2.12662000  | -1.04556200 |
| Cl | 0.00000000 | -2.12662000 | -1.04556200 |
| Cm | 0.00000000 | 0.00000000  | 0.32281000  |
| Cl | 0.00000000 | 2.16477000  | -0.91145400 |
| Cl | 0.00000000 | -2.16477000 | -0.91145400 |
| Bk | 0.00000000 | 0.00000000  | 0.30825000  |
| Cl | 0.00000000 | 2.17272000  | -0.87943000 |
| Cl | 0.00000000 | -2.17272000 | -0.87943000 |
| Cf | 0.00000000 | 0.00000000  | 0.34308000  |
| Cl | 0.00000000 | 2.15189400  | -0.98887800 |
| Cl | 0.00000000 | -2.15189400 | -0.98887800 |
| Es | 0.00000000 | 0.00000000  | 0.32786600  |
| Cl | 0.00000000 | 2.15912300  | -0.95466800 |
| Cl | 0.00000000 | -2.15912300 | -0.95466800 |
| Fm | 0.00000000 | 0.00000000  | 0.32043400  |
| Cl | 0.00000000 | 2.15948600  | -0.94245300 |
| Cl | 0.00000000 | -2.15948600 | -0.94245300 |
| Md | 0.00000000 | 0.00000000  | 0.26874600  |
| Cl | 0.00000000 | 2.27329500  | -0.79833400 |
| Cl | 0.00000000 | -2.27329500 | -0.79833400 |

|    |            |             |             |
|----|------------|-------------|-------------|
| No | 0.00000000 | 0.00000000  | 0.30911700  |
| Cl | 0.00000000 | 2.17660200  | -0.92735000 |
| Cl | 0.00000000 | -2.17660200 | -0.92735000 |

### Lower Multiplicity Structures

|    |            |             |             |
|----|------------|-------------|-------------|
| Cm | 0.00000000 | 0.00000000  | 0.37149500  |
| Cl | 0.00000000 | 2.04791200  | -1.04892800 |
| Cl | 0.00000000 | -2.04791200 | -1.04892800 |

|    |            |             |             |
|----|------------|-------------|-------------|
| Bk | 0.00000000 | 0.00000000  | 0.35722300  |
| Cl | 0.00000000 | 2.13841200  | -1.01913700 |
| Cl | 0.00000000 | -2.13841200 | -1.01913700 |
